# Supplementary material
Source: Hindawi journal article supplement (doi:10.1155/2011/809378)
Supplement: f1 [file 809378.f1.xls]

## Sheet: Tabelle1
Symbol	Articles	expression in blood (%)	expression in heart (%)	expression in vascular (%)	expression in kidney (%)	max. expression (%)		Drugs	DrugBank ID and Drug Name
REN	156	0	0	0	19.27	39.58	intestine	11	DB00212
									Remikiren
									DB01844
									Dimethylformamide
									DB02803
									3-Phenyl-1,2-Propandiol
									DB03395
									Enalkiren
									DB04387
									1-Hydroxy-2-Amino-3-Cyclohexylpropane
									DB02296
									1-Hydroxy-3-Methylbutane
									DB04379
									N-Methyl-N-(Methylbenzyl)Formamide
									DB03968
									1-Methyl-2-Oxy-5,5-Dimethyl Pyrrolidine
									DB03024
									2-Methyl-3-(2-Aminothiazolo)Propanal
									DB01258
									Aliskiren
									DB03736
									2-Cyclopropylmethylenepropanal
NPPA	122	88.04	0	0	0	88.04	heart	0
AGT	64	1.79	18.54	0	5.71	29.74	liver	7	DB01076
									Atorvastatin
									DB01029
									Irbesartan
									DB01258
									Aliskiren
									DB00641
									Simvastatin
									DB01092
									Ouabain
									DB00722
									Lisinopril
									DB01340
									Cilazapril
ADM	55	0.95	1.38	1.09	3.11	15.3	adipose tissue	0
ACE	39	0.86	2.37	4.09	4.53	15.63	parathyroid	16	DB01197
									Captopril
									DB01348
									Spirapril
									DB00691
									Moexipril
									DB00542
									Benazepril
									DB04184
									Acetate Ion
									DB00178
									Ramipril
									DB00790
									Perindopril
									DB01180
									Rescinnamine
									DB01089
									Deserpidine
									DB02032
									1-(3-Mercapto-2-Methyl-Propionyl)-Pyrrolidine-2-Carboxylic Acid
									DB00881
									Quinapril
									DB00492
									Fosinopril
									DB03740
									2-(Acetylamino)-2-Deoxy-a-D-Glucopyranose
									DB00519
									Trandolapril
									DB00722
									Lisinopril
									DB00584
									Enalapril
EDN1	39	0	4.12	15.82	2.77	32.68	umbilical cord	0
NPPB	31	85.93	0	0	1.2	85.93	heart	2	DB01136
									Carvedilol
									DB00624
									Testosterone
RAPGEF5	28	0	0	0	0.76	76.62	parathyroid	0
NOS3	27	3.92	2.69	2.33	2.2	20.32	spleen	41	DB02335
									2-Aminothiazoline
									DB02589
									Se-Ethyl-Isoselenourea
									DB02234
									Ethylisothiourea
									DB04018
									S-Isopropyl-Isothiourea
									DB04402
									2-Propanol, Isopropanol
									DB04534
									5-Nitroindazole
									DB03963
									S-(Dimethylarsenic)Cysteine
									DB02207
									7-Nitroindazole
									DB02911
									2,4-Diamino-6-Phenyl-5,6,7,8,-Tetrahydropteridine
									DB01997
									3-Bromo-7-Nitroindazole
									DB04559
									N-(Chlorophenyl)-N'-Hydroxyguanidine
									DB03065
									7-Nitroindazole-2-Carboxamidine
									DB00155
									L-Citrulline
									DB03910
									S,S'-(1,3-Phenylene-Bis(1,2-Ethanediyl))Bis-Isothiourea
									DB01098
									Rosuvastatin
									DB03305
									N5-Iminoethyl-L-Ornithine
									DB01867
									Ethylene Glycol
									DB02692
									(6r,1'r,2's)-5,6,7,8 Tetrahydrobiopterin
									DB02048
									1,2,4-Triazole-Carboxamidine
									DB00360
									Tetrahydrobiopterin
									DB01821
									L-N(Omega)-Nitroarginine-2,4-L-Diaminobutyric Amide
									DB02044
									N-(3-(Aminomethyl)Benzyl)Acetamidine
									DB01686
									N,N-dimethylarginine
									DB03144
									N-Omega-Hydroxy-L-Arginine
									DB03684
									2-Methyl-2,4-Pentanediol
									DB03707
									S-Ethyl-N-Phenyl-Isothiourea
									DB02994
									Hydroxydimethylarsine Oxide
									DB01833
									L-2-Amino-4-(Guanidinooxy)Butyric Acid
									DB00125
									L-Arginine
									DB02077
									L-N(Omega)-Nitroarginine-(4r)-Amino-L-Proline Amide
									DB03918
									6s-5,6,7,8-Tetrahydrobiopterin
									DB04399
									Cacodylate Ion
									DB04184
									Acetate Ion
									DB02979
									N1,N14-Bis((S-Methyl)Isothioureido)Tetradecane
									DB02027
									N-{(4s)-4-Amino-5-[(2-Aminoethyl)Amino]Pentyl}-N'-Nitroguanidine
									DB02141
									S,S'-(1,4-Phenylene-Bis(1,2-Ethanediyl))Bis-Isothiourea
									DB03014
									Heme
									DB03974
									L-Homoarginine
									DB03332
									5,6-Cyclic-Tetrahydropteridine
									DB04223
									Nitroarginine
									DB03100
									6-Nitroindazole
EPO	22	0	0	0	0	58.82	prostate	0
CNP	21	0.85	1.74	3.58	5.4	18.03	brain	0
TGFB1	20	8.67	0.99	0	1.79	17.67	salivary gland	1	DB00070
									Hyaluronidase
MME	19	0.26	3.59	0	11.63	12.06	lymph node	6	DB02558
									N-(3-Phenyl-2-Sulfanylpropanoyl)Phenylalanylalanine
									DB02557
									Phosphoramidon
									DB00616
									Candoxatril
									DB02062
									N-[3-[(1-Aminoethyl)(Hydroxy)Phosphoryl]-2-(1,1'-Biphenyl-4-Ylmethyl)Propanoyl]Alanine
									DB02597
									[2(R,S)-2-Sulfanylheptanoyl]-Phe-Ala
									DB01654
									Thiorphan
PTGS2	19	16.39	0	29.1	0.59	29.1	vascular	43	DB00328
									Indomethacin
									DB00154
									gamma-Homolinolenic acid
									DB02709
									Resveratrol
									DB01240
									Epoprostenol
									DB01628
									Etoricoxib
									DB01283
									Lumiracoxib
									DB00963
									Bromfenac
									DB00469
									Tenoxicam
									DB00573
									Fenoprofen
									DB00788
									Naproxen
									DB00749
									Etodolac
									DB00991
									Oxaprozin
									DB01404
									Ginseng
									DB01041
									Thalidomide
									DB01188
									Ciclopirox
									DB04743
									Nimesulide
									DB00712
									Flurbiprofen
									DB00945
									Aspirin
									DB00784
									Mefenamic acid
									DB00533
									Rofecoxib
									DB00814
									Meloxicam
									DB00939
									Meclofenamic acid
									DB00861
									Diflunisal
									DB00605
									Sulindac
									DB00244
									Mesalazine
									DB00316
									Acetaminophen
									DB01399
									Salsalate
									DB00482
									Celecoxib
									DB00586
									Diclofenac
									DB00461
									Nabumetone
									DB01050
									Ibuprofen
									DB01014
									Balsalazide
									DB01009
									Ketoprofen
									DB00821
									Carprofen
									DB00500
									Tolmetin
									DB01600
									Tiaprofenic acid
									DB00812
									Phenylbutazone
									DB00936
									Salicyclic acid
									DB00465
									Ketorolac
									DB00580
									Valdecoxib
									DB00870
									Suprofen
									DB00159
									Icosapent
									DB00480
									Lenalidomide
INS	18	0	0	0	0	100	pancreas	1	DB01776
									M-Cresol
NPR1	17	0	1.32	2.29	2.83	23.69	mammary gland	7	DB04899
									Nesiritide
									DB00727
									Nitroglycerin
									DB01020
									Isosorbide Mononitrate
									DB01613
									Erythrityl Tetranitrate
									DB00325
									Nitroprusside
									DB00883
									Isosorbide Dinitrate
									DB00435
									Nitric Oxide
DDR1	13	0	0.94	0	0.46	20.12	trachea	1	DB00619
									Imatinib
NOS2	13	4.23	0	0	0	25.4	pharynx	0
HESX1	10	0	0	0	0	43.18	ovary	0
KNG1	10	0	0	0	33.18	57.18	liver	1	DB01092
									Ouabain
NCF1	10	10.88	0	0	0.76	32.38	lymph node	0
PLEK	10	11.02	0.34	1.77	0.87	16.81	lymph	0
CALCA	9	0	0	0	0	100	prostate	1	DB00692
									Phentolamine
FOS	9	19.04	2.09	4.31	0.77	19.04	blood	0
S100A6	9	1.2	0.87	5.16	1.18	20.08	umbilical cord	1	DB03131
									Beta-Mercaptoethanol
AVP	8	0	0	0	80	80	kidney	0
NOS1	8	0	0	0	1.68	65.97	muscle	1	DB00155
									L-Citrulline
AKT1	7	1.14	1.57	0.45	1.51	13.52	salivary gland	3	DB01169
									Arsenic trioxide
									DB01863
									Inositol 1,3,4,5-Tetrakisphosphate
									DB00171
									Adenosine triphosphate
CALCRL	7	0	2.55	14.85	1.39	25.06	trachea	0
CYBB	7	19.44	0	2.55	3.15	27.68	lymph node	0
EDNRA	7	0	6.4	2.21	1.63	10.94	uterus	1	DB00559
									Bosentan
ICAM1	7	3.19	0.55	2.39	1.62	15.19	spleen	2	DB00108
									Natalizumab
									DB00641
									Simvastatin
MAPK1	7	1.84	1.35	2.36	1.44	10.94	mouth	2	DB01169
									Arsenic trioxide
									DB02733
									Purvalanol
RAMP2	7	5.09	0	0	1.85	28.7	thyroid	1	DB01278
									Pramlintide
RHOA	7	2.5	1.57	2.02	1.72	5.28	cervix	3	DB04315
									Guanosine-5'-Diphosphate
									DB01076
									Atorvastatin
									DB00641
									Simvastatin
SERPINE1	7	0.17	0.12	14.5	0.69	27.77	umbilical cord	8	DB00013
									Urokinase
									DB03166
									Acetic Acid
									DB01093
									Dimethyl sulfoxide
									DB00031
									Tenecteplase
									DB01076
									Atorvastatin
									DB00197
									Troglitazone
									DB00641
									Simvastatin
									DB00055
									Drotrecogin alfa
SHBG	7	0	0	0	0	36.84	eye	13	DB03882
									5-Alpha-Androstane-3-Beta,17beta-Diol
									DB00624
									Testosterone
									DB04402
									2-Propanol, Isopropanol
									DB03926
									5-Alpha-Androstane-3-Beta,17-Alpha-Diol
									DB00648
									Mitotane
									DB00783
									Estradiol
									DB00858
									Dromostanolone
									DB01185
									Fluoxymesterone
									DB00717
									Norethindrone
									DB01406
									Danazol
									DB00655
									Estrone
									DB02901
									Dihydrotestosterone
									DB00741
									Hydrocortisone
UTS2	7	0	0	0	3.88	35.92	spleen	0
AGTR1	6	0	5.19	0	3.3	19.1	larynx	11	DB00177
									Valsartan
									DB00796
									Candesartan
									DB00678
									Losartan
									DB01029
									Irbesartan
									DB00966
									Telmisartan
									DB01347
									Saprisartan
									DB01342
									Forasartan
									DB01349
									Tasosartan
									DB00421
									Spironolactone
									DB00876
									Eprosartan
									DB00275
									Olmesartan
EPHB2	6	6.73	0	0	2.85	14.78	umbilical cord	0
ISYNA1	6	1.49	0.43	0.52	3.31	17.72	umbilical cord	0
NFKB1	6	4.69	0.76	0.66	1.62	8.69	nerve	3	DB01411
									Pranlukast
									DB01041
									Thalidomide
									DB01234
									Dexamethasone
NR3C2	6	0	0	6.41	7.08	20.74	stomach	6	DB01134
									Desoxycorticosterone Pivalate
									DB00700
									Eplerenone
									DB00421
									Spironolactone
									DB00687
									Fludrocortisone
									DB04652
									(11-BETA)-11,21-DIHYDROXY-PREGN-4-ENE-3,20-DIONE
									DB04630
									Aldosterone
OLR1	6	1.23	0	0	2.15	81.05	esophagus	0
UTS2R	6	0	0	0	0	100	ovary	0
CCL2	5	0	0	0	0	100	placenta	4	DB01055
									Mimosine
									DB01076
									Atorvastatin
									DB01406
									Danazol
									DB00641
									Simvastatin
COX5A	5	0	0	0	0	100	muscle	0
COX8A	5	0.77	11.02	1.48	0.98	11.02	heart	0
CPOX	5	9.24	3.63	0	5.28	11.06	liver	0
CYBA	5	2.25	6.82	1.67	3.43	15.46	tonsil	0
EGFR	5	0	2.2	1.69	2.49	14.89	mouth	9	DB03496
									Flavopiridol
									DB00281
									Lidocaine
									DB01259
									Lapatinib
									DB01269
									Panitumumab
									DB00002
									Cetuximab
									DB00530
									Erlotinib
									DB02584
									N-{3-Chloro-4-[(3-Fluorobenzyl)Oxy]Phenyl}-6-[5-({[2-(Methylsulfonyl)Ethyl]Amino}Methyl)-2-Furyl]-4-Quinazolinamine
									DB00072
									Trastuzumab
									DB00317
									Gefitinib
GPR182	5	0	0	0	0	38.67	adrenal gland	0
PPARG	5	0	1.46	2.52	3.72	12.08	placenta	7	DB04689
									2-{5-[3-(6-BENZOYL-1-PROPYLNAPHTHALEN-2-YLOXY)PROPOXY]INDOL-1-YL}ETHANOIC ACID
									DB01076
									Atorvastatin
									DB00197
									Troglitazone
									DB01132
									Pioglitazone
									DB00412
									Rosiglitazone
									DB04270
									(S)-3-(4-(2-Carbazol-9-Yl-Ethoxy)-Phenyl)-2-Ethoxy-Propionic Acid
									DB00159
									Icosapent
RAMP3	5	7.76	0	0	2.54	21.44	adipose tissue	1	DB01278
									Pramlintide
AGTRAP	4	1.98	4.8	1.14	1.68	11.82	salivary gland	0
ATR	4	0	0	1.23	0.91	12.24	nerve	0
BEST1	4	8.92	1.75	0	0.64	37.58	eye	0
CRP	4	1.53	0	0	0	55.86	liver	3	DB01393
									Bezafibrate
									DB01076
									Atorvastatin
									DB03945
									Phosphocholine
IFI44	4	0	0	0	0	100	uterus	0
PSMC6	4	2.47	3.4	5.86	1.23	23.46	adipose tissue	0
PTH	4	0	0	0	0	99.6	parathyroid	1	DB04419
									Norleucine
RELA	4	0	0	0	0	62.32	lymph node	0
RHO	4	0	0	0	0	84.62	eye	13	DB04450
									Heptyl 1-Thiohexopyranoside
									DB04522
									Phosphonoserine
									DB02944
									Alpha-D-Mannose
									DB03381
									Hexadecanal
									DB02482
									Phosphonothreonine
									DB01728
									3-[Aminoethylphosphoryl]-[1,2-Di-Palmitoyl]-Sn-Glycerol
									DB01159
									Halothane
									DB04079
									Heptane-1,2,3-Triol
									DB04147
									Lauryl Dimethylamine-N-Oxide
									DB02687
									Beta-D-Mannose
									DB03796
									Palmitic Acid
									DB02451
									B-Nonylglucoside
									DB04233
									(Hydroxyethyloxy)Tri(Ethyloxy)Octane
ABP1	3	2.17	0	0	0	81.03	placenta	4	DB02944
									Alpha-D-Mannose
									DB00594
									Amiloride
									DB00127
									Spermine
									DB01750
									Naphthalen-1-Yl-Acetic Acid
ADIPOQ	3	0	4.44	0	0.4	38.38	adipose tissue	0
ADRA1D	3	0	0	0	0	65.08	bone	17	DB00420
									Promazine
									DB00368
									Norepinephrine
									DB01403
									Methotrimeprazine
									DB00590
									Doxazosin
									DB06262
									Droxidopa
									DB00298
									Dapiprazole
									DB01162
									Terazosin
									DB00457
									Prazosin
									DB00777
									Propiomazine
									DB00226
									Guanadrel Sulfate
									DB00217
									Bethanidine
									DB04840
									Debrisoquin
									DB06144
									Sertindole
									DB01170
									Guanethidine
									DB01608
									Propericiazine
									DB00706
									Tamsulosin
									DB00346
									Alfuzosin
CDK20	3	0	0	0	50	50	kidney	0
CDKL1	3	0	0	0	8.97	12.82	cervix	0
ECE1	3	1.26	1.73	6.57	1.85	20.04	umbilical cord	0
IFNG	3	75.21	0	0	7.69	75.21	blood	2	DB01296
									Glucosamine
									DB00641
									Simvastatin
IL1B	3	80	0	0	0	80	blood	3	DB01017
									Minocycline
									DB00026
									Anakinra
									DB01366
									Procaterol
LEP	3	3.27	0	0	0	62.04	adipose tissue	0
MAPK14	3	4.29	4.09	1.57	1.94	13.67	bladder	15	DB02277
									1-(5-Tert-Butyl-2-Methyl-2h-Pyrazol-3-Yl)-3-(4-Chloro-Phenyl)-Urea
									DB01761
									4-[5-[2-(1-Phenyl-Ethylamino)-Pyrimidin-4-Yl]-1-Methyl-4-(3-Trifluoromethylphenyl)-1h-Imidazol-2-Yl]-Piperidine
									DB02873
									1-(2,6-Dichlorophenyl)-5-(2,4-Difluorophenyl)-7-Piperazin-1-Yl-3,4-Dihydroquinazolin-2(1h)-One
									DB01988
									6((S)-3-Benzylpiperazin-1-Yl)-3-(Naphthalen-2-Yl)-4-(Pyridin-4-Yl)Pyrazine
									DB03044
									1-(5-Tert-Butyl-2-P-Tolyl-2h-Pyrazol-3-Yl)-3-[4-(2-Morpholin-4-Yl-Ethoxy)-Naphthalen-1-Yl]-Urea
									DB02195
									3-(4-Fluorophenyl)-1-Hydroxy-2-(Pyridin-4-Yl)-1h-Pyrrolo[3,2-B]Pyridine
									DB02352
									3-(Benzyloxy)Pyridin-2-Amine
									DB03110
									2-Chlorophenol
									DB04632
									4-(2-HYDROXYBENZYLAMINO)-N-(3-(4-FLUOROPHENOXY)PHENYL)PIPERIDINE-1-SULFONAMIDE
									DB02984
									4-[3-Methylsulfanylanilino]-6,7-Dimethoxyquinazoline
									DB04338
									SB220025
									DB01953
									Inhibitor of P38 Kinase
									DB01948
									1-(2,6-Dichlorophenyl)-5-(2,4-Difluorophenyl)-7-Piperidin-4-Yl-3,4-Dihydroquinolin-2(1h)-One
									DB01807
									N-[(3z)-5-Tert-Butyl-2-Phenyl-1,2-Dihydro-3h-Pyrazol-3-Ylidene]-N'-(4-Chlorophenyl)Urea
									DB04797
									Triazolopyridine
MAPK3	3	2.92	3.18	0.63	1.69	12.57	nerve	5	DB01064
									Isoproterenol
									DB01169
									Arsenic trioxide
									DB02733
									Purvalanol
									DB00605
									Sulindac
									DB00641
									Simvastatin
MAPT	3	0	0	1.05	5.43	27.98	nerve	0
NCF4	3	2.6	17.16	0	0.47	17.16	blood	0
NLRP3	3	8.16	0	0	0	24.49	thymus	0
NPR3	3	1.98	2.72	0	23.27	23.27	kidney	3	DB02944
									Alpha-D-Mannose
									DB04899
									Nesiritide
									DB03965
									Fucose
POLDIP2	3	1.34	2.37	0.99	1.7	8.52	larynx	0
PSMD7	3	2.8	2.37	0.8	1.67	8.98	ascites	0
RABEPK	3	0.65	2.38	0	1.37	8.56	cervix	0
RPSA	3	0	2.29	0	0	30.21	umbilical cord	0
SGCB	3	0.47	2.56	7.81	2.74	17.31	mouth	0
SRC	3	0.69	0	0	1.99	12.52	umbilical cord	6	DB01254
									Dasatinib
									DB04751
									Purvalanol A
									DB04739
									4-[(4-METHYL-1-PIPERAZINYL)METHYL]-N-[3-[[4-(3-PYRIDINYL)-2-PYRIMIDINYL]AMINO]PHENYL]-BENZAMIDE
									DB01962
									Phosphonotyrosine
									DB01678
									RU84687
									DB01893
									N6-Benzyl Adenosine-5'-Diphosphate
TFAP2A	3	0	0	1.29	1.56	16.64	placenta	0
VCAM1	3	0	0	13.01	15.75	41.78	ear	1	DB01136
									Carvedilol
VEGFA	3	2.06	0	9.77	2.31	15.17	pituitary gland	0
ABCC9	2	0	7.1	0	3.87	26.24	ear	2	DB01016
									Glibenclamide
									DB00171
									Adenosine triphosphate
ACE2	2	0	0	0	10.33	72.16	testis	1	DB00691
									Moexipril
ACTN4	2	3.08	0.73	0.25	2.24	7.01	larynx	0
ADORA1	2	0	6.59	0	16.77	24.55	brain	7	DB00458
									Imipramine
									DB00277
									Theophylline
									DB00201
									Caffeine
									DB00061
									Pegademase bovine
									DB00996
									Gabapentin
									DB04932
									Defibrotide
									DB01223
									Aminophylline
APLN	2	0	5.36	12.5	8.28	12.5	vascular	0
APLNR	2	2.63	0.38	0	0.43	30.12	spleen	0
AQP2	2	0	0	0	59.24	59.24	kidney	0
CASP3	2	7.23	2.06	5.77	2.96	7.38	esophagus	4	DB03124
									5-[4-(1-Carboxymethyl-2-Oxo-Propylcarbamoyl)-Benzylsulfamoyl]-2-Hydroxy-Benzoic Acid
									DB01065
									Melatonin
									DB01017
									Minocycline
									DB00641
									Simvastatin
CD74	2	1.42	0.83	0.66	0.24	42.35	tonsil	0
CEBPB	2	1.53	3.15	0	2.1	13.16	bone	0
CFH	2	0	0	0	0	71.43	stomach	0
CTF1	2	0	0	0	0	40.91	nerve	0
DPP4	2	1.83	1.08	3.14	6.62	22.17	parathyroid	10	DB02944
									Alpha-D-Mannose
									DB04491
									Diisopropylphosphono Group
									DB03253
									(2s)-Pyrrolidin-2-Ylmethylamine
									DB01261
									Sitagliptin
									DB02004
									5-(Aminomethyl)-6-(2,4-Dichlorophenyl)-2-(3,5-Dimethoxyphenyl)Pyrimidin-4-Amine
									DB04578
									(S)-2-[(R)-3-amino-4-(2-fluorophenyl)butyryl]-1,2,3,4-tetrahydroisoquinoline-3-carboxamide
									DB01884
									2-Amino-3-Methyl-1-Pyrrolidin-1-Yl-Butan-1-One
									DB04577
									1-(1-phenylcyclopentyl)methylamine
									DB03965
									Fucose
									DB03660
									Iodo-Phenylalanine
EDNRB	2	0	3.64	1.26	1.85	14.82	placenta	1	DB00559
									Bosentan
EGF	2	0	1.81	0	12.97	40.56	connective tissue	1	DB00605
									Sulindac
ELANE	2	29.27	0	0	0	49.39	bone marrow	0
FABP1	2	0	0	0	4.06	51.58	liver	3	DB02659
									Cholic Acid
									DB01915
									S-Hydroxycysteine
									DB03796
									Palmitic Acid
FOSB	2	1.18	0.12	0	0.05	63.21	trachea	0
GCNT2	2	0.98	1.35	0	1.72	25.64	trachea	0
GOT2	2	1.09	6.61	3.66	3.53	6.61	heart	4	DB02783
									4'-Deoxy-4'-Acetylyamino-Pyridoxal-5'-Phosphate
									DB00142
									L-Glutamic Acid
									DB00114
									Pyridoxal Phosphate
									DB00128
									L-Aspartic Acid
HP	2	3.5	0	0	0.09	88.19	liver	0
ID1	2	1.96	0.57	1.37	1.74	13.18	stomach	0
IL6ST	2	0.19	2.05	3.13	2.29	10.15	parathyroid	0
KCNJ11	2	0	0	0	8.14	23.84	thyroid	9	DB00912
									Repaglinide
									DB01119
									Diazoxide
									DB00731
									Nateglinide
									DB00922
									Levosimendan
									DB00308
									Ibutilide
									DB01252
									Mitiglinide
									DB01016
									Glibenclamide
									DB00222
									Glimepiride
									DB00661
									Verapamil
MED23	2	0.4	0.55	1.9	0.9	16.27	larynx	0
MGEA5	2	1.39	2.37	0.98	1.44	15.98	stomach	0
MLC1	2	2.04	0	0.81	1.78	71.03	brain	0
NCF2	2	0	50.13	0.73	0.54	50.13	blood	0
NOX1	2	0	0	0	0	98.17	intestine	0
NPPC	2	0	0	0	0	100	skin	0
PIK3CA	2	1.35	3.1	14.02	1.3	14.02	vascular	0
PIK3CB	2	0	0	0	0	100	uterus	0
PIK3CD	2	5.41	0.57	0.99	1.2	28.79	lymph node	0
PIK3CG	2	7.77	0	0	0	19.74	bone marrow	5	DB02656
									2-(4-Morpholinyl)-8-Phenyl-4h-1-Benzopyran-4-One
									DB02375
									Myricetin
									DB04769
									5-QUINOXALIN-6-YLMETHYLENE-THIAZOLIDINE-2,4-DIONE
									DB02010
									Staurosporine
									DB04216
									Quercetin
PIK3R1	2	3.02	7.43	0.8	2.35	7.85	brain	1	DB01064
									Isoproterenol
PL-5283	2	0	0	0	0	100	pancreas	0
PPA1	2	1.46	0.53	1.7	1.13	5.91	stomach	0
PPARA	2	0.71	2.95	1.7	6.16	14.73	muscle	7	DB00636
									Clofibrate
									DB01393
									Bezafibrate
									DB01076
									Atorvastatin
									DB01890
									Deoxy-Bigchap
									DB01241
									Gemfibrozil
									DB00641
									Simvastatin
									DB01039
									Fenofibrate
PRKCE	2	2.93	2.68	0	3.9	19.88	lymph node	0
RHOB	2	0.19	2.44	12.07	11.74	12.07	vascular	0
ROS1	2	0	0	44.19	0	44.19	vascular	0
SOD1	2	3.1	1.85	3.84	1.12	5.51	pancreas	1	DB03382
									S-Oxy Cysteine
SST	2	0	0	0	0	100	pancreas	2	DB00847
									Cysteamine
									DB01200
									Bromocriptine
STXBP1	2	0	0	1.14	1.69	20.24	brain	0
ADH6	1	NA	NA	NA	NA	NA	NA	1	DB03461
									2'-Monophosphoadenosine 5'-Diphosphoribose
CTGF	1	NA	NA	NA	NA	NA	NA	0
GRK1	1	NA	NA	NA	NA	NA	NA	0
HCL2	1	NA	NA	NA	NA	NA	NA	0
IGAN	1	NA	NA	NA	NA	NA	NA	0
STN	1	NA	NA	NA	NA	NA	NA	0
ACSBG1	1	0	2.98	0	2.44	34.15	nerve	0
ADH1A	1	0	1.59	0	0	69.12	liver	5	DB01907
									Nicotinamide-Adenine-Dinucleotide
									DB00157
									NADH
									DB01213
									Fomepizole
									DB04065
									N-Cyclopentyl-N-Cyclobutylformamide
									DB02721
									4-Iodopyrazole
ADH1B	1	0	4.7	0.91	0.33	35.32	adipose tissue	7	DB01907
									Nicotinamide-Adenine-Dinucleotide
									DB00157
									NADH
									DB01213
									Fomepizole
									DB03703
									Cyclohexanol
									DB04105
									N-Heptylformamide
									DB02481
									N-Benzylformamide
									DB02721
									4-Iodopyrazole
ADH1C	1	0	2.45	0	1	33.96	intestine	4	DB02131
									N-1-Methylheptylformamide
									DB01907
									Nicotinamide-Adenine-Dinucleotide
									DB00157
									NADH
									DB01213
									Fomepizole
ADH4	1	0	0	0	0	100	liver	1	DB00157
									NADH
ADRB2	1	7.05	3.88	0	3.17	13.05	spleen	33	DB00668
									Epinephrine
									DB00901
									Bitolterol
									DB00816
									Orciprenaline
									DB00368
									Norepinephrine
									DB00612
									Bisoprolol
									DB00983
									Formoterol
									DB01408
									Bambuterol
									DB00571
									Propranolol
									DB01203
									Nadolol
									DB06262
									Droxidopa
									DB01136
									Carvedilol
									DB00373
									Timolol
									DB01064
									Isoproterenol
									DB01291
									Pirbuterol
									DB01288
									Fenoterol
									DB01158
									Bretylium
									DB00598
									Labetalol
									DB01210
									Levobunolol
									DB01580
									Oxprenolol
									DB01151
									Desipramine
									DB00866
									Alprenolol
									DB01001
									Salbutamol
									DB00852
									Pseudoephedrine
									DB00521
									Carteolol
									DB01214
									Metipranolol
									DB00871
									Terbutaline
									DB00960
									Pindolol
									DB00938
									Salmeterol
									DB01407
									Clenbuterol
									DB01359
									Penbutolol
									DB01274
									Arformoterol
									DB00867
									Ritodrine
									DB01366
									Procaterol
AHSP	1	41.74	11.77	0	0	41.74	blood	0
AKR1A1	1	0	100	0	0	100	heart	2	DB02383
									Tolrestat
									DB03461
									2'-Monophosphoadenosine 5'-Diphosphoribose
AKR1B1	1	0	0	0	100	100	kidney	15	DB02383
									Tolrestat
									DB03461
									2'-Monophosphoadenosine 5'-Diphosphoribose
									DB01689
									Inhibitor Idd 384
									DB02020
									Alrestatin
									DB04272
									Citric Acid
									DB02021
									Fidarestat
									DB02712
									Sorbinil
									DB02834
									IDD552
									DB02007
									Alpha-D-Glucose-6-Phosphate
									DB02518
									N-Acetylalanine
									DB00605
									Sulindac
									DB00157
									NADH
									DB02994
									Hydroxydimethylarsine Oxide
									DB02101
									Fidarestat(Stereoisomer)
									DB02132
									[3-(4-Bromo-2-Fluoro-Benzyl)-7-Chloro-2,4-Dioxo-3,4-Dihydro-2h-Quinazolin-1-Yl]-Acetic Acid
AKR1C2	1	0	0	0	0	60	liver	4	DB03461
									2'-Monophosphoadenosine 5'-Diphosphoribose
									DB00157
									NADH
									DB04184
									Acetate Ion
									DB01586
									Ursodeoxycholic acid
AKR1C3	1	0.53	0.38	2.15	2.03	24.03	parathyroid	9	DB03461
									2'-Monophosphoadenosine 5'-Diphosphoribose
									DB01093
									Dimethyl sulfoxide
									DB02056
									(5e,13e)-9,15-Dihydroxy-11-Oxoprosta-5,13-Dien-1-Oicacid
									DB03684
									2-Methyl-2,4-Pentanediol
									DB02266
									Flufenamic Acid
									DB00157
									NADH
									DB04184
									Acetate Ion
									DB01698
									Rutin
									DB01536
									4-Androstenedione
ALDH2	1	1.09	2.58	1.11	1.64	10.4	adipose tissue	8	DB00822
									Disulfiram
									DB04381
									Crotonaldehyde
									DB02115
									Daidzin
									DB00727
									Nitroglycerin
									DB01907
									Nicotinamide-Adenine-Dinucleotide
									DB01867
									Ethylene Glycol
									DB00536
									Guanidine
									DB00157
									NADH
ALDH7A1	1	0	2.52	0	2.44	10.2	larynx	2	DB00157
									NADH
									DB00165
									Pyridoxine
ALDH9A1	1	2.43	2.13	2.63	4.7	6.25	adipose tissue	1	DB00157
									NADH
AMBP	1	0	2.7	0	0.2	85.31	liver	2	DB00062
									Human Serum Albumin
									DB00064
									Serum albumin iodonated
AMY2A	1	0	0	0	0	87.94	pancreas	13	DB03439
									4,6-Dideoxy-4-Amino-Alpha-D-Glucose
									DB03495
									4,6-Dideoxy-4-{[4,5,6-Trihydroxy-3-(Hydroxymethyl)Cyclohex-2-En-1-Yl]Amino}-Alpha-D-Lyxo-Hexopyranosyl-(1->4)-Alpha-D-Threo-Hexopyranosyl-(1->6)-Alpha-L-Threo-Hexopyranose
									DB03773
									6-Deoxy-Alpha-D-Glucose
									DB02218
									N-[4-Hydroxymethyl-Cyclohexan-6-Yl-1,2,3-Triol]-4,6-Dideoxy-4-Aminoglucopyranoside
									DB03092
									5-Hydroxymethyl-Chonduritol
									DB02379
									Beta-D-Glucose
									DB03971
									Acarbose Derived Hexasaccharide
									DB04453
									4-O-(4,6-Dideoxy-4-{[4-[(4-O-Hexopyranosylhexopyranosyl)Oxy]-5,6-Dihydroxy-3-(Hydroxymethyl)Cyclohex-2-En-1-Yl]Amino}Hexopyranosyl)Hexopyranose
									DB04618
									4,6-DIDEOXY-4-{[4-[(4-O-HEXOPYRANOSYLHEXOPYRANOSYL)OXY]-5,6-DIHYDROXY-3-(HYDROXYMETHYL)CYCLOHEX-2-EN-1-YL]AMINO}HEXOPYRANOSYL-(1->4)HEXOPYRANOSYL-(1->4)HEXOPYRANOSE
									DB00284
									Acarbose
									DB02889
									4-O-(4,6-Dideoxy-4-{[4,5,6-Trihydroxy-3-(Hydroxymethyl)Cyclohex-2-En-1-Yl]Amino}-Beta-D-Lyxo-Hexopyranosyl)-Alpha-D-Erythro-Hexopyranose
									DB03088
									Pyroglutamic Acid
									DB01922
									Maltosyl-Alpha (1,4)-D-Gluconhydroximo-1,5-Lactam
ANGPT1	1	1.23	2.54	4.39	2.47	26.68	bone marrow	0
ANGPT2	1	0	0	17.04	2.06	17.04	vascular	0
ANK1	1	6.84	5.22	1.8	0	35.9	muscle	0
APOE	1	0	11.76	0	12.3	15.51	adrenal gland	2	DB00062
									Human Serum Albumin
									DB00064
									Serum albumin iodonated
APP	1	0.8	1.5	2.04	2.49	10.56	thyroid	1	DB02235
									Methionine Sulfoxide
ATP2A2	1	0.38	6.49	0.92	1.9	15.37	muscle	0
B2M	1	0.64	6.34	2.45	0.55	28.56	pharynx	0
BLVRB	1	4.38	1.33	0.63	0.93	11.44	salivary gland	7	DB03461
									2'-Monophosphoadenosine 5'-Diphosphoribose
									DB04345
									7,8-dimethylalloxazine
									DB02073
									Biliverdine Ix Alpha
									DB04363
									Mesobiliverdin Iv Alpha
									DB00140
									Riboflavin
									DB00157
									NADH
									DB03247
									Riboflavin Monophosphate
C2ORF3	1	2.33	0	0	3.1	12.21	nerve	0
CA5A	1	0	0	0	0	100	liver	0
CAPN1	1	2.82	0.12	1.05	1.74	13.52	mouth	1	DB04653
									CBZ-LEU-LEU-TYR-CH2F
CAPNS1	1	1.78	0.86	1.03	1.93	8.03	larynx	1	DB02570
									PD150606
CAV1	1	0.07	3.92	18.02	1.86	18.02	vascular	0
CAV2	1	0	2.95	7.35	5.55	8.73	adipose tissue	0
CD8A	1	1.67	0.33	0	0.21	64.5	thymus	0
CDK9	1	1.28	1.17	1.01	1.97	17.66	thyroid	1	DB03496
									Flavopiridol
COMT	1	0.75	1.04	0.89	1.44	18.79	skin	3	DB00323
									Tolcapone
									DB01235
									Levodopa
									DB00494
									Entacapone
CREBBP	1	1.53	2.1	0.52	2.15	16.68	larynx	0
CSF3	1	0	0	0	0	28.11	cervix	0
CSNK1E	1	1.7	1.56	1.35	1.42	9.24	cervix	0
CTF2P	1	0.04	0.12	20.32	2.8	20.32	vascular	0
CXCL17	1	0	0	0	0	21.02	pharynx	0
CYP11B2	1	0	0	0	0	100	adrenal gland	0
DBP	1	0.96	1.05	1.66	2.44	9.8	lymph	0
DCLK1	1	0	0	0	1.22	21.68	brain	0
DCLK2	1	0	12.19	0	1.11	17.45	nerve	0
DMPK	1	0	7.1	0	1.88	11.56	salivary gland	0
DYM	1	2.84	1.17	8.89	1.67	8.89	vascular	0
EDA	1	0	4.93	0	4.04	24.66	spleen	0
EDN2	1	0	64.71	0	11.76	64.71	heart	0
EIF4E	1	2.56	5.28	0	2.56	9.76	bone marrow	2	DB02716
									7-Methyl-Guanosine-5'-Triphosphate
									DB01649
									7-Methyl-Gpppa
EIF6	1	2.01	4.75	0.27	1.32	6.96	lymph	0
ELN	1	0	4.58	2.47	0.26	20.9	connective tissue	1	DB00533
									Rofecoxib
ETV3	1	5.78	0	0	7.71	14.22	adrenal gland	0
F12	1	0	0	0	1.04	45.19	ascites	0
F8	1	0	0	0	4.06	21.04	parathyroid	2	DB00100
									Coagulation Factor IX
									DB00055
									Drotrecogin alfa
FAAH	1	0	0	0	1.01	9.97	mouth	2	DB00818
									Propofol
									DB00599
									Thiopental
FAM111B	1	7.08	3.24	5.6	2.65	25.66	lymph node	0
FN1	1	0.18	1.38	4.3	1.64	13.45	connective tissue	4	DB00031
									Tenecteplase
									DB00029
									Anistreplase
									DB00009
									Alteplase
									DB00015
									Reteplase
FST	1	0	0.71	0	0.9	23.66	ear	1	DB01666
									D-Myo-Inositol-Hexasulphate
GCLC	1	0	0	0	0	100	lung	2	DB00151
									L-Cysteine
									DB00142
									L-Glutamic Acid
GHRL	1	44.04	0	0	0	44.04	blood	0
GNAI1	1	0	3.03	2.09	2.59	8.38	adipose tissue	0
GNPTAB	1	2.52	0.58	5.05	2.68	12.88	larynx	0
GSTM1	1	0	6.27	0	0.76	11.98	nerve	3	DB02165
									Zinc Trihydroxide
									DB00143
									Glutathione
									DB02458
									Glutathione S-(2,4 Dinitrobenzene)
HAPLN1	1	0	1.35	0	1.72	33.83	ear	0
HMGCR	1	1.98	0.91	2.12	1.92	11	trachea	15	DB00175
									Pravastatin
									DB01095
									Fluvastatin
									DB03461
									2'-Monophosphoadenosine 5'-Diphosphoribose
									DB04377
									3-Hydroxy-3-Methyl-Glutaric Acid
									DB01992
									Coenzyme A
									DB03431
									Adenosine-5'-Diphosphate
									DB00439
									Cerivastatin
									DB04447
									1,4-Dithiothreitol
									DB01393
									Bezafibrate
									DB00227
									Lovastatin
									DB01098
									Rosuvastatin
									DB03169
									(S)-Hmg-Coa
									DB01076
									Atorvastatin
									DB00157
									NADH
									DB00641
									Simvastatin
HR	1	3.17	2.18	0	0.79	16.04	larynx	0
HTR2B	1	4.06	0	19.29	18.78	19.29	vascular	9	DB01239
									Chlorprothixene
									DB01403
									Methotrimeprazine
									DB00669
									Sumatriptan
									DB00574
									Fenfluramine
									DB00216
									Eletriptan
									DB01079
									Tegaserod
									DB01224
									Quetiapine
									DB00508
									Triflupromazine
									DB00805
									Minaprine
HUNK	1	0	0	0	0	59.95	ear	0
IGKV1-5	1	0.21	0.51	1.02	0.88	35.36	pharynx	0
IL10	1	38.1	0	0	0	42.86	spleen	0
IL2	1	100	0	0	0	100	blood	7	DB04278
									2-[2-(2-Cyclohexyl-2-Guanidino-Acetylamino)-Acetylamino]-N-(3-Mercapto-Propyl)-Propionamide
									DB03957
									SP2456
									DB03453
									(R)-N-[2-[1-(Aminoiminomethyl)-3-Piperidinyl]-1-Oxoethyl]-4-(Phenylethynyl)-L-Phenylalanine Methylester
									DB03455
									(1h-Indol-3-Yl)-(2-Mercapto-Ethoxyimino)-Acetic Acid
									DB02581
									5-[2,3-Dichloro-4-(5-{1-[2-(2-Guanidino-4-Methyl-Pentanoylamino)-Acetyl]-Piperidin-4-Yl}-1-Methyl-1h-Pyrazol-3-Yl)-Phenoxymethyl]-Furan-2-Carboxylic Acid
									DB03372
									3-Mercapto-1-(1,3,4,9-Tetrahydro-B-Carbolin-2-Yl)-Propan-1-One
									DB02555
									SP4160
IL4	1	0	57.14	0	0	57.14	blood	0
INSR	1	0.67	1.38	0.79	3.68	10.08	parathyroid	4	DB03909
									Adenosine-5'-[Beta, Gamma-Methylene]Triphosphate
									DB00071
									Insulin, porcine
									DB00047
									Insulin Glargine recombinant
									DB00030
									Insulin recombinant
IRS1	1	0.9	0	0	0.33	27.91	connective tissue	0
JAK1	1	0	0	33.33	0	56.14	lymph node	0
JAK2	1	3.22	0	12.87	1.21	21.72	bone marrow	1	DB04716
									2-(1,1-DIMETHYLETHYL)9-FLUORO-3,6-DIHYDRO-7H-BENZ[H]-IMIDAZ[4,5-F]ISOQUINOLIN-7-ONE
KCNJ8	1	0	9.54	0	5.2	21.97	adipose tissue	1	DB00922
									Levosimendan
LIF	1	0	0	0	1.04	14.25	embryonic tissue	0
LIFR	1	0	3.03	8.49	3.09	8.65	muscle	0
LPHN1	1	0	1.91	0	1.33	7.94	eye	0
LTA	1	0	12	0	0	42.55	tonsil	1	DB00005
									Etanercept
LTF	1	0	0	0	0	100	uterus	5	DB01811
									3h-Indole-5,6-Diol
									DB02944
									Alpha-D-Mannose
									DB02737
									Oxalate Ion
									DB00487
									Pefloxacin
									DB03965
									Fucose
MBP	1	0.47	0.21	0	27.87	54.47	brain	0
MLN	1	0	0	0	0	100	stomach	0
MMP1	1	0.1	0	62.18	0.02	62.18	vascular	0
MMP2	1	0.11	1.93	5.19	1.72	9.77	bone	3	DB00786
									Marimastat
									DB00605
									Sulindac
									DB01630
									SC-74020
MS4A1	1	10.89	0	0.57	0.12	30.59	spleen	3	DB00078
									Ibritumomab
									DB00081
									Tositumomab
									DB00073
									Rituximab
NAGPA	1	2.66	2.58	0	3.38	18.2	cervix	1	DB00141
									N-Acetyl-D-glucosamine
NANP	1	1.3	7.15	0	0	14.47	mouth	0
NCL	1	0	0	0	0	100	liver	0
NDUFB3	1	10.18	4.27	0.92	1.79	21.09	parathyroid	1	DB00157
									NADH
NEDD4L	1	1.11	3.42	0.66	4.22	7.78	prostate	0
NFASC	1	0.69	0.95	0	5.3	16.41	nerve	0
NPR2	1	0	3.12	0	2.65	16.93	pituitary gland	2	DB04899
									Nesiritide
									DB01613
									Erythrityl Tetranitrate
NPTXR	1	0	1.98	0	2.52	21.58	brain	0
NPY6R	1	15.22	0	0	1.38	25.61	mouth	0
NR3C1	1	2.32	1.78	6.2	3.62	9.62	pituitary gland	15	DB01222
									Budesonide
									DB00180
									Flunisolide
									DB00663
									Flumethasone Pivalate
									DB00635
									Prednisone
									DB00443
									Betamethasone
									DB00834
									Mifepristone
									DB00288
									Amcinonide
									DB00959
									Methylprednisolone
									DB00588
									Fluticasone Propionate
									DB00769
									Hydrocortamate
									DB00873
									Loteprednol Etabonate
									DB02210
									Hexane-1,6-Diol
									DB00741
									Hydrocortisone
									DB00764
									Mometasone
									DB01234
									Dexamethasone
NSUN4	1	0.64	1.86	1.11	1.05	16.58	larynx	0
NTSR1	1	0	0	0	0	64.78	ascites	0
OAP	1	NA	NA	NA	NA	NA	NA	0
OPA1	1	0.7	1.44	1.66	2.66	7.06	bone marrow	0
OPRL1	1	3.65	5.02	0	4.11	57.53	nerve	1	DB01497
									Etorphine
PAH	1	0	0.63	0	20.51	70.82	liver	11	DB04400
									7,8-dihydrobiopterin
									DB00668
									Epinephrine
									DB00368
									Norepinephrine
									DB03673
									Beta(2-Thienyl)Alanine
									DB06262
									Droxidopa
									DB04419
									Norleucine
									DB02562
									Quinonoid 7,8-Tetrahydrobiopterin
									DB01235
									Levodopa
									DB02692
									(6r,1´r2´s)-5,6,7,8 Tetrahydrobiopterin
									DB00360
									Tetrahydrobiopterin
									DB00120
									L-Phenylalanine
PCNA	1	2.34	2.33	1.93	4.55	8.9	thymus	0
PDE5A	1	0	3.18	13.88	3.4	13.88	vascular	10	DB00862
									Vardenafil
									DB04272
									Citric Acid
									DB00277
									Theophylline
									DB03597
									Gamma-Glutamyl[S-(2-Iodobenzyl)Cysteinyl]Glycine
									DB06267
									Udenafil
									DB00806
									Pentoxifylline
									DB00975
									Dipyridamole
									DB00820
									Tadalafil
									DB01972
									Guanosine-5'-Monophosphate
									DB00203
									Sildenafil
PDGFA	1	0	0	0	0	29.41	lung	0
PDP1	1	1.09	2.24	3.87	3.47	12.17	adrenal gland	0
PEG10	1	0	9.44	1.25	1.53	18.31	pituitary gland	0
PLA2G4A	1	0	0	7.95	3.77	30.13	pharynx	8	DB00180
									Flunisolide
									DB00591
									Fluocinolone Acetonide
									DB01047
									Fluocinonide
									DB00588
									Fluticasone Propionate
									DB00846
									Flurandrenolide
									DB01103
									Quinacrine
									DB00253
									Medrysone
									DB00324
									Fluorometholone
PLB1	1	18.73	0	0	3.01	27.09	bone marrow	0
PLG	1	1.06	1.46	0	29.39	60.24	liver	6	DB00013
									Urokinase
									DB00513
									Aminocaproic Acid
									DB00302
									Tranexamic Acid
									DB00086
									Streptokinase
									DB06692
									Aprotinin
									DB03709
									Bicine
PNOC	1	0	0	0	0	51.76	tonsil	0
POMC	1	0	0	0	0	99.73	pituitary gland	6	DB01565
									Dihydromorphine
									DB00836
									Loperamide
									DB01497
									Etorphine
									DB00741
									Hydrocortisone
									DB01108
									Trilostane
									DB01548
									Diprenorphine
PPP1R12A	1	2.83	1.07	4.51	1.82	9.55	ear	0
PPRC1	1	0.85	1.74	0	0.21	21.55	larynx	0
PRB2	1	0	0	0	0	82.14	muscle	0
PRH1	1	0	0.05	0.12	0.12	53.25	larynx	0
PRL	1	0.04	0	0	0	99.67	pituitary gland	0
PSMD4	1	0	0	0	0	100	muscle	0
PTGIS	1	0	1.73	0	0	23.9	adipose tissue	1	DB00812
									Phenylbutazone
PTGS1	1	0.96	1.98	26.58	1.08	26.58	vascular	49	DB00328
									Indomethacin
									DB00154
									gamma-Homolinolenic acid
									DB02047
									2-(1,1'-Biphenyl-4-Yl)Propanoic Acid
									DB02709
									Resveratrol
									DB02944
									Alpha-D-Mannose
									DB04817
									Dipyrone
									DB01283
									Lumiracoxib
									DB00963
									Bromfenac
									DB04557
									Arachidonic Acid
									DB00469
									Tenoxicam
									DB02198
									2-Bromoacetyl Group
									DB00573
									Fenoprofen
									DB00788
									Naproxen
									DB03122
									B-Octylglucoside
									DB00749
									Etodolac
									DB03753
									Flurbiprofen Methyl Ester
									DB02379
									Beta-D-Glucose
									DB00554
									Piroxicam
									DB01188
									Ciclopirox
									DB00712
									Flurbiprofen
									DB01837
									O-Acetylserine
									DB00945
									Aspirin
									DB00784
									Mefenamic acid
									DB00533
									Rofecoxib
									DB03667
									Acetic Acid Salicyloyl-Amino-Ester
									DB00939
									Meclofenamic acid
									DB00861
									Diflunisal
									DB02773
									(3-Chloro-4-Propoxy-Phenyl)-Acetic Acid
									DB00605
									Sulindac
									DB00244
									Mesalazine
									DB01892
									Hyperforin
									DB03783
									Phenacetin
									DB00316
									Acetaminophen
									DB01399
									Salsalate
									DB02687
									Beta-D-Mannose
									DB00586
									Diclofenac
									DB01050
									Ibuprofen
									DB00461
									Nabumetone
									DB03752
									P-(2'-Iodo-5'-Thenoyl)Hydrotropic Acid
									DB01014
									Balsalazide
									DB01009
									Ketoprofen
									DB00500
									Tolmetin
									DB02110
									Protoporphyrin Ix Containing Co
									DB00350
									Minoxidil
									DB03014
									Heme
									DB00936
									Salicyclic acid
									DB00465
									Ketorolac
									DB00870
									Suprofen
									DB00159
									Icosapent
REG1A	1	0.08	0.23	0	0.24	69.4	pancreas	1	DB03721
									O-Sialic Acid
RHCE	1	0	31.5	0	0	47.24	connective tissue	0
RHOC	1	0.85	2.34	1.01	2.41	12.24	salivary gland	0
RNH1	1	0.7	3.09	0.91	1.73	8.38	ascites	0
SETBP1	1	0	1.33	0	7.88	14.79	ear	0
SETD2	1	1.8	1.97	0	3.99	7	lung	0
SHC1	1	0.53	1.57	4.44	2.79	8.34	mouth	0
SMAD2	1	5.15	1.84	2.14	2.2	8.77	nerve	0
SP1	1	2.3	4.98	1.56	3.25	8.44	lymph node	0
SPEN	1	4.3	0	0	2.15	38.71	pharynx	0
SPP1	1	0	0	0	0	80.79	ear	0
SRPX2	1	0	0	18.26	1.31	18.26	vascular	0
TAC1	1	0	0	0	2.07	37.82	spleen	1	DB00626
									Bacitracin
TF	1	2.11	1.97	0	6.65	35.23	liver	4	DB02737
									Oxalate Ion
									DB01402
									Bismuth
									DB01370
									Aluminium
									DB00893
									Iron Dextran
TFPI	1	0.68	4.67	3.27	2.76	22.67	placenta	1	DB00036
									Coagulation factor VIIa
TIMELESS	1	1.03	0	0	1.37	8.51	ascites	0
TIMP1	1	1.65	0.52	1.97	0.88	8.76	larynx	0
TNF	1	32.35	4.65	0	0	32.35	blood	15	DB00051
									Adalimumab
									DB01411
									Pranlukast
									DB00640
									Adenosine
									DB00005
									Etanercept
									DB01041
									Thalidomide
									DB01076
									Atorvastatin
									DB00608
									Chloroquine
									DB01232
									Saquinavir
									DB01407
									Clenbuterol
									DB01427
									Amrinone
									DB01296
									Glucosamine
									DB00641
									Simvastatin
									DB01366
									Procaterol
									DB00704
									Naltrexone
									DB00065
									Infliximab
TPI1	1	1.5	2.14	0.55	1.97	12.25	pharynx	4	DB01093
									Dimethyl sulfoxide
									DB02726
									2-Phosphoglycolic Acid
									DB04326
									1,3-Dihydroxyacetonephosphate
									DB03314
									Fluorotryptophane
TRIM26	1	0.76	2.09	0.45	1.21	17.2	umbilical cord	0
UBE2S	1	1.64	1.49	0	1.04	10.93	tonsil	0
UCP2	1	3.26	1.49	0.32	1.27	12.86	tonsil	0
VDR	1	0.95	2.29	0	1.1	59.13	parathyroid	9	DB00136
									Calcitriol
									DB03451
									1alpha,25-Dihydroxyl-20-Epi-22-Oxa-24,26,27-Trihomovitamin D3
									DB04258
									Seocalcitol
									DB02300
									Calcipotriol
									DB01070
									Dihydrotachysterol
									DB00146
									Calcidiol
									DB00910
									Paricalcitol
									DB04796
									19-nor-14-epi-23-yne-1,25 dihydroxyvitamin D3
									DB00153
									Ergocalciferol
ZIC3	1	0	0	0	0	35.21	embryonic tissue	0
